# Supplementary material
Source: PubMed Central journal article supplement (PMC7855261)

**Supplemental Information for:**

**A small molecule that binds an RNA repeat expansion stimulates its decay  
via the exosome complex**

Alicia J. Angelbello<sup>1,5</sup>, Raphael I. Benhamou<sup>1,5</sup>, Suzanne G. Rzuczek<sup>1,5</sup>, Shruti Choudhary<sup>1</sup>, Zhenzhi Tang<sup>2</sup>, Jonathan L. Chen<sup>1</sup>, Madhuparna Roy<sup>3</sup>, Kye Won Wang<sup>4</sup>, Ilyas Yildirim<sup>4</sup>, Albert S. Jun<sup>3</sup>, Charles A. Thornton<sup>2</sup>, and Matthew D. Disney<sup>1,6,\*</sup>

<sup>1</sup> Department of Chemistry, The Scripps Research Institute, Jupiter, FL 33458, United States of America

<sup>2</sup> Department of Neurology, School of Medicine and Dentistry, University of Rochester, Rochester, New York 14642, United States of America

<sup>3</sup> Wilmer Eye Institute, Johns Hopkins Medical Institutions, Baltimore, Maryland 21287, United States of America

<sup>4</sup> Department of Chemistry, Florida Atlantic University, Jupiter, FL 33458 United States of America

<sup>5</sup> These authors contributed equally to this work

<sup>6</sup> Lead contact

\* correspondence: [Disney@scripps.edu](mailto:Disney@scripps.edu)

| <b>Table S1.</b> Sequences of primers used for RT-PCR and RT-qPCR (related to STAR Methods). |                             |                           |         |
|----------------------------------------------------------------------------------------------|-----------------------------|---------------------------|---------|
| Gene                                                                                         | Forward Primer (5'-3')      | Reverse Primer (5'-3')    | Purpose |
| <i>MBNL1</i>                                                                                 | GCTGCCCAATACCAGGTCAAC       | TGGTGGGAGAAATGCTGTATGC    | RT-PCR  |
| <i>MBNL1</i> exon 5                                                                          | CTCAGTCGGCTGTCAAATCA        | AGAGCAGGCCTCTTTGGTAA      | qPCR    |
| <i>MAP4K4</i>                                                                                | CCTCATCCAGTGAGGAGTCG        | ATCACAGGAAAATCCCACCA      | RT-PCR  |
| <i>DMPK</i>                                                                                  | CGTGCAAGCGCCCAG             | CTCCACCAACTTACTGTTTCATCCT | qPCR    |
| <i>GAPDH</i>                                                                                 | AAGGTGAAGGTCGGAGTCAA        | AATGAAGGGGTCAATTGATGG     | qPCR    |
| <i>Clcn1</i>                                                                                 | TGAAGGAATACCTCACACTCAAGG    | CACGGAACACAAAGGCACTG      | RT-PCR  |
| <i>Serca1</i>                                                                                | GTCATGGTCCTCAAGATCTCAC      | GGGTCAGTGCCTCAGCTTTG      | RT-PCR  |
| <i>Itgb</i>                                                                                  | CCTACTGGTCCCGACATCATC       | CTTCGGATTGACCACAGTTGTC    | RT-PCR  |
| <i>Capzb</i>                                                                                 | GCACGCTGAATGAGATCTACTTTG    | CCGGTTAGCGTGAAGCAGAG      | RT-PCR  |
| <i>TCF4</i> mature mRNA                                                                      | ACGATGAGGACCTGACAC          | GTCTGGGGCTTGTCACCTT       | qPCR    |
| <i>TCF4</i> intron 3                                                                         | GAGAGAGGGAGTGAAAGAGAGA      | GGCAATGTCCATTTCCATCT      | qPCR    |
| <i>EXOSC10</i>                                                                               | CTCTTTGGACCTCACGACTGCT      | AAGAGGCTCGCCTGCTTCTGAA    | qPCR    |
| <i>DIS3</i>                                                                                  | ACCCTCACTTAAAATAGAAGATACAGT | CCATTAAGGTCCATGTTTGAAGT   | qPCR    |
| <i>XRN1</i>                                                                                  | CCAGCAAAGCAGTCGTGGAGAA      | CCACGACTCTAGCTTCCTCAAG    | qPCR    |

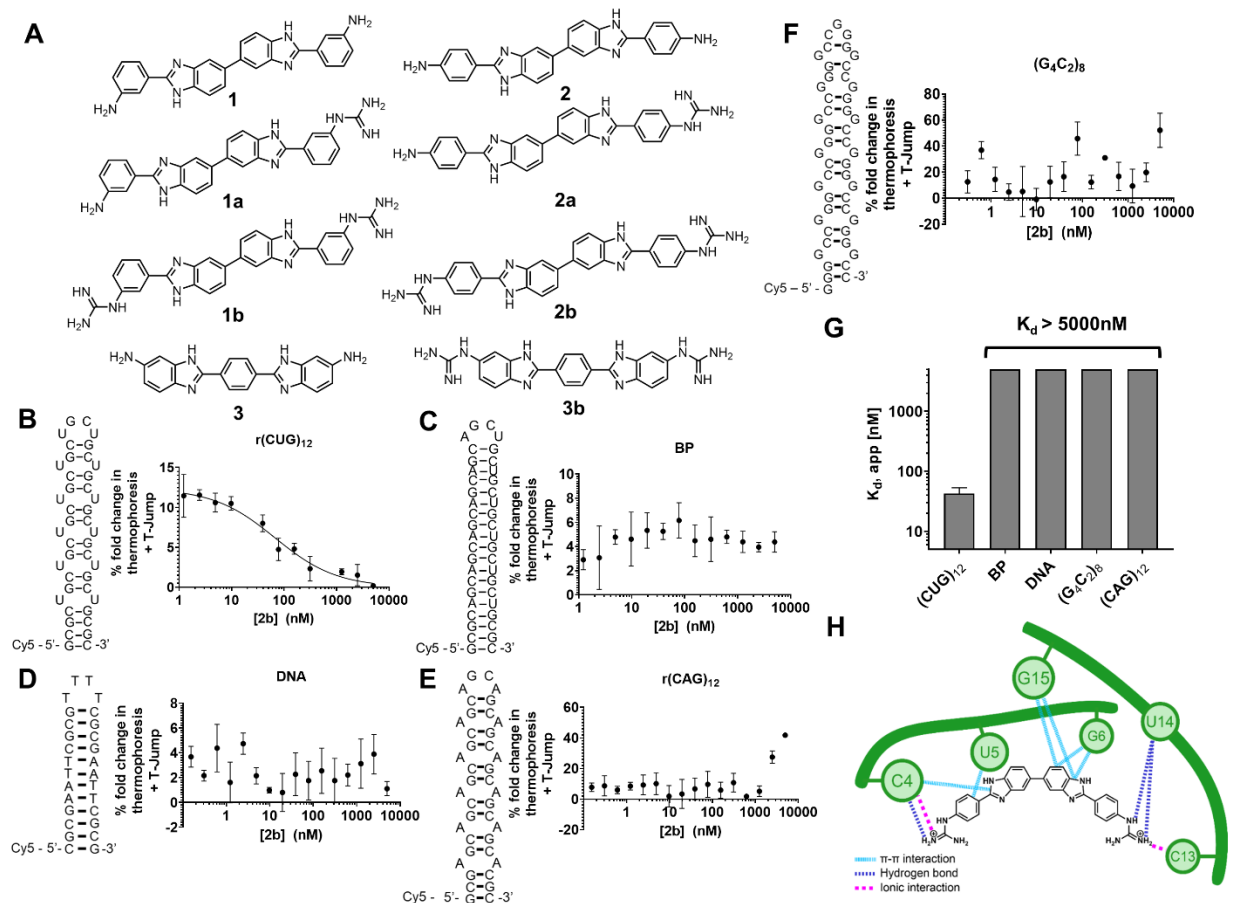

**Figure S1.** Chemical structures and binding analysis of **2b** (related to Figure 2). (A) Chemical structures of all compounds tested. (B) Thermophoresis analysis of **2b** bound to r(CUG)<sub>12</sub> (n = 3 independent experiments). (C) Thermophoresis analysis of **2b** with a base-paired control RNA (n = 3 independent experiments). (D) Thermophoresis analysis of **2b** with AT-rich (n = 3 independent experiments). (E) Thermophoresis analysis of **2b** with a r(CAG)<sub>12</sub> (n = 3 independent experiments). (F) Thermophoresis analysis of **2b** with a r(G<sub>4</sub>C<sub>2</sub>)<sub>8</sub> (n = 3 independent experiments). (G) Plot of the K<sub>d,app</sub> of **2b** and r(CUG)<sub>12</sub> (K<sub>d</sub> = 42 ± 6 nM) and to a base-paired control, AT-rich DNA, r(G<sub>4</sub>C<sub>2</sub>)<sub>8</sub> and r(CAG)<sub>12</sub> (K<sub>d</sub> > 5000 nM). Error bars indicate SD for all panels. (H) Schematic of interactions of **2b** with r(CCGCUGCGG)<sub>2</sub>. Pink lines are ionic interactions, dark blue lines are hydrogen bonding interactions, and light blue lines are stacking interactions.

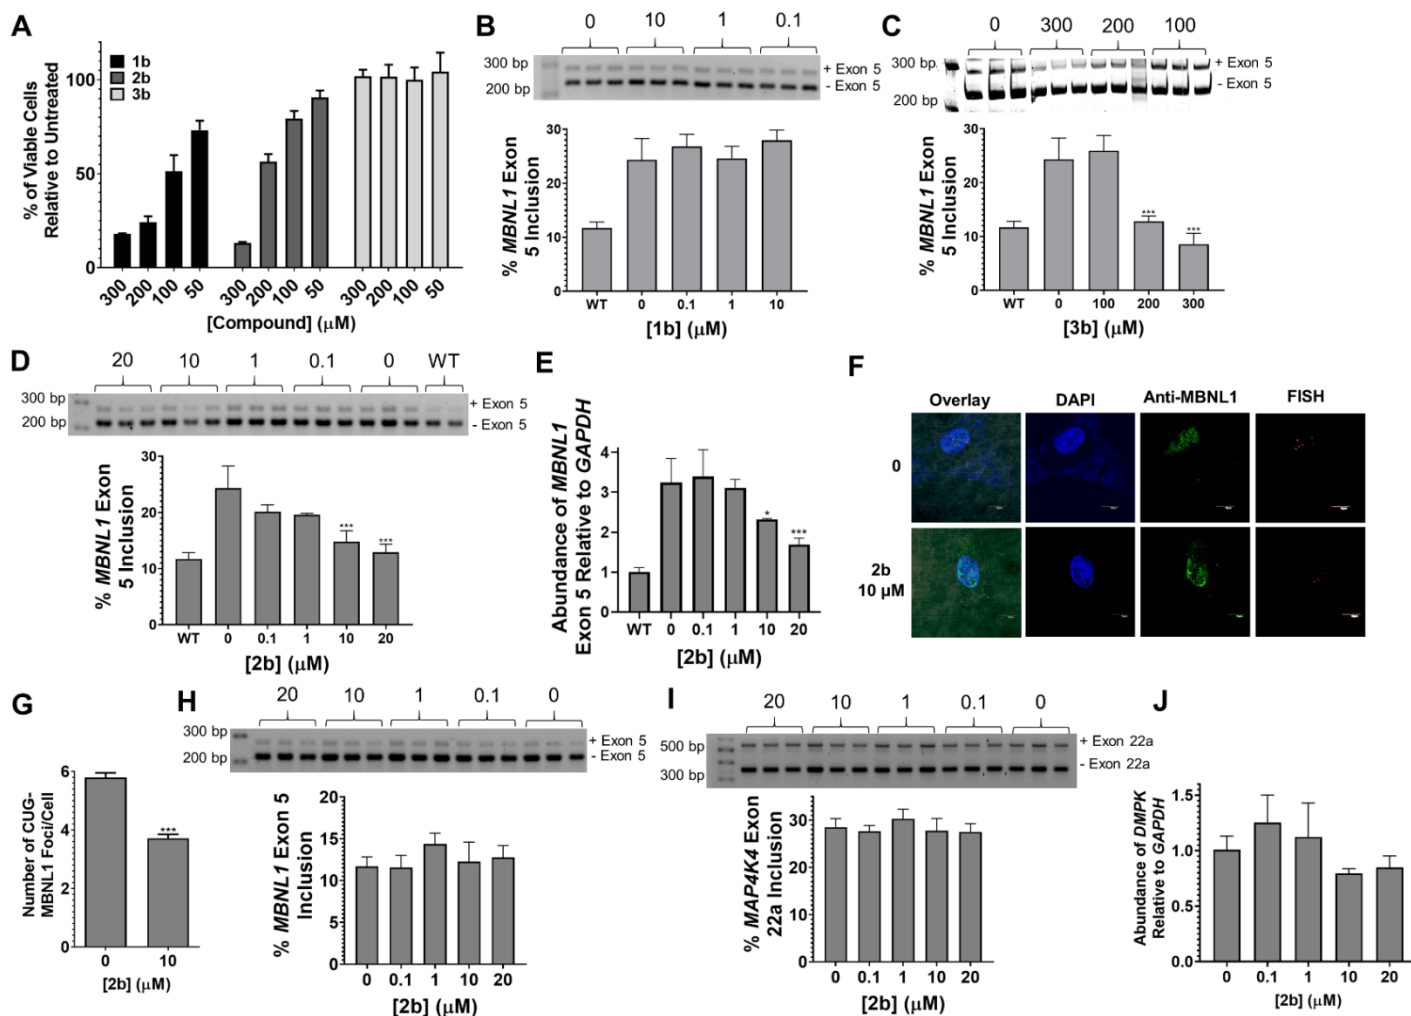

**Figure S2.** Activity of compounds in DM1 and wild-type fibroblasts (related to Figure 2). (A) Toxicity of **1b**, **2b**, and **3b** in DM1 fibroblasts as determined by WST-1 cell viability reagent (n = 5). (B) Representative gel image of *MBNL1* exon 5 splicing in DM1 fibroblasts treated with **1b** (top) and quantification of *MBNL1* exon 5 inclusion in DM1 fibroblasts treated with **1b** (bottom) (n = 3). (C) Representative gel image of *MBNL1* exon 5 splicing in DM1 fibroblasts treated with **3b** (top) and quantification of *MBNL1* exon 5 inclusion in DM1 fibroblasts treated with **3b** (bottom) (n = 3). (D) Representative gel image of *MBNL1* exon 5 splicing in DM1 fibroblasts treated with **2b** (top) and quantification of *MBNL1* exon 5 inclusion in DM1 fibroblasts treated with **2b** (bottom) (n = 3). (E) RT-qPCR analysis of *MBNL1* exon 5 inclusion in DM1 fibroblasts treated with **2b** (n = 3). (F) Representative images of r(CUG)<sup>exp</sup>-MBNL1 foci as determined by MBNL1

immunostaining and RNA FISH. (G) Quantification of the number of nuclear foci/cell (n = 3, 40 cells counted/replicate). Error bars indicate SD; \*\*\*,  $P < 0.001$ , as determined by a two-tailed Student *t*-test. (H) Representative gel image of *MBNL1* exon 5 splicing in wild-type fibroblasts treated with **2b** (top) and quantification of *MBNL1* exon 5 splicing in wild-type fibroblasts treated with **2b** (bottom) (n = 3). (I) Representative gel image of *MAP4K4* exon 22a splicing in DM1 fibroblasts treated with **2b** (top) and quantification of *MAP4K4* exon 22a splicing in DM1 fibroblasts treated with **2b** (bottom) (n = 3). (J) Compound **2b** does not affect *DMPK* abundance in DM1 fibroblasts, as determined by RT-qPCR (n = 3). For all panels: error bars indicate SD; \*\*,  $P < 0.01$ ; \*\*\*,  $P < 0.001$ , as determined by a one-way ANOVA, unless otherwise noted.

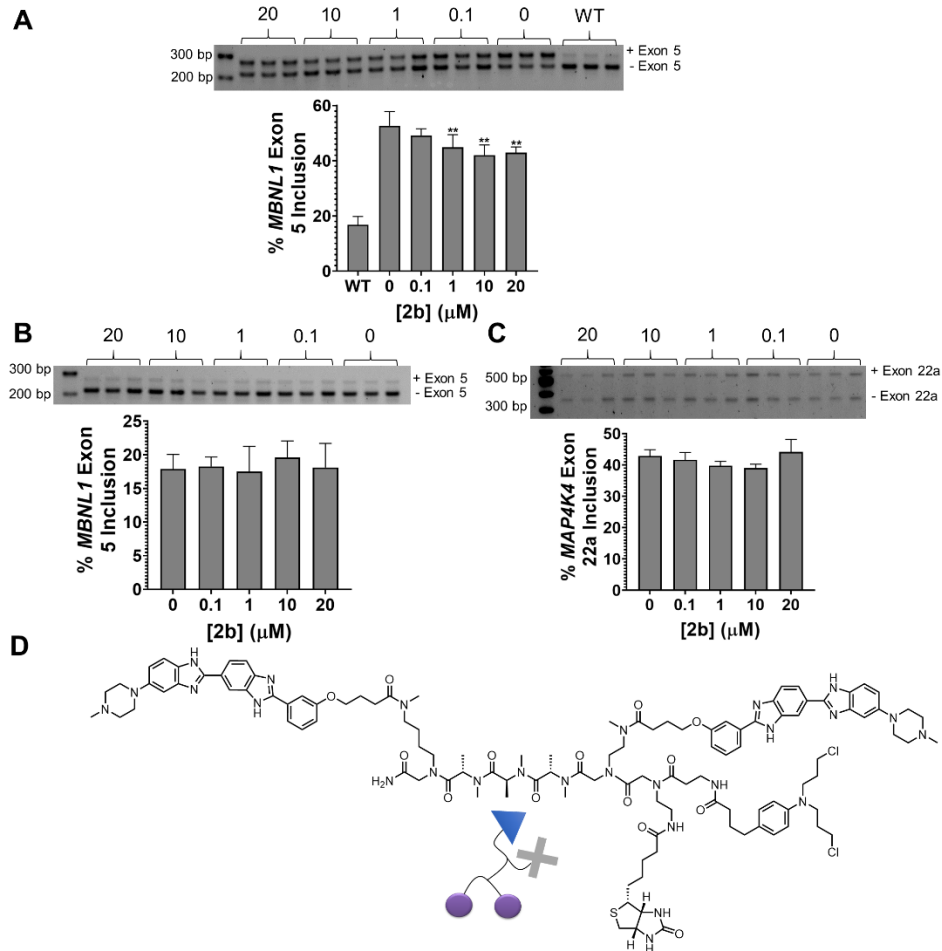

**Figure S3.** Activity of **2b** in DM1 and wild-type myotubes (related to Figures 3 and 4). (A) Representative gel image of *MBNL1* exon 5 splicing in DM1 myotubes treated with **2b** (top) and quantification of *MBNL1* exon 5 inclusion in DM1 myotubes treated with **2b** (bottom) (n = 3). (B) Representative gel image of *MBNL1* exon 5 splicing in wild-type myotubes treated with **2b** (top) and quantification of *MBNL1* exon 5 splicing in wild-type myotubes treated with **2b** (bottom) (n = 3). (C) Representative gel image of *MAP4K4* exon 22a splicing in DM1 myotubes treated with **2b** (top) and quantification of *MAP4K4* exon 22a splicing in DM1 myotubes treated with **2b** (bottom) (n = 3). (D) Chemical structure of Chem-CLIP probe **2H-K4NMeS-CA-Biotin** synthesized as previously described (Rzuczek et al., 2017). For all panels: n = 3; error bars indicate SD; \*\*,  $P < 0.01$ ; \*\*\*,  $P < 0.001$ , as determined by a one-way ANOVA.

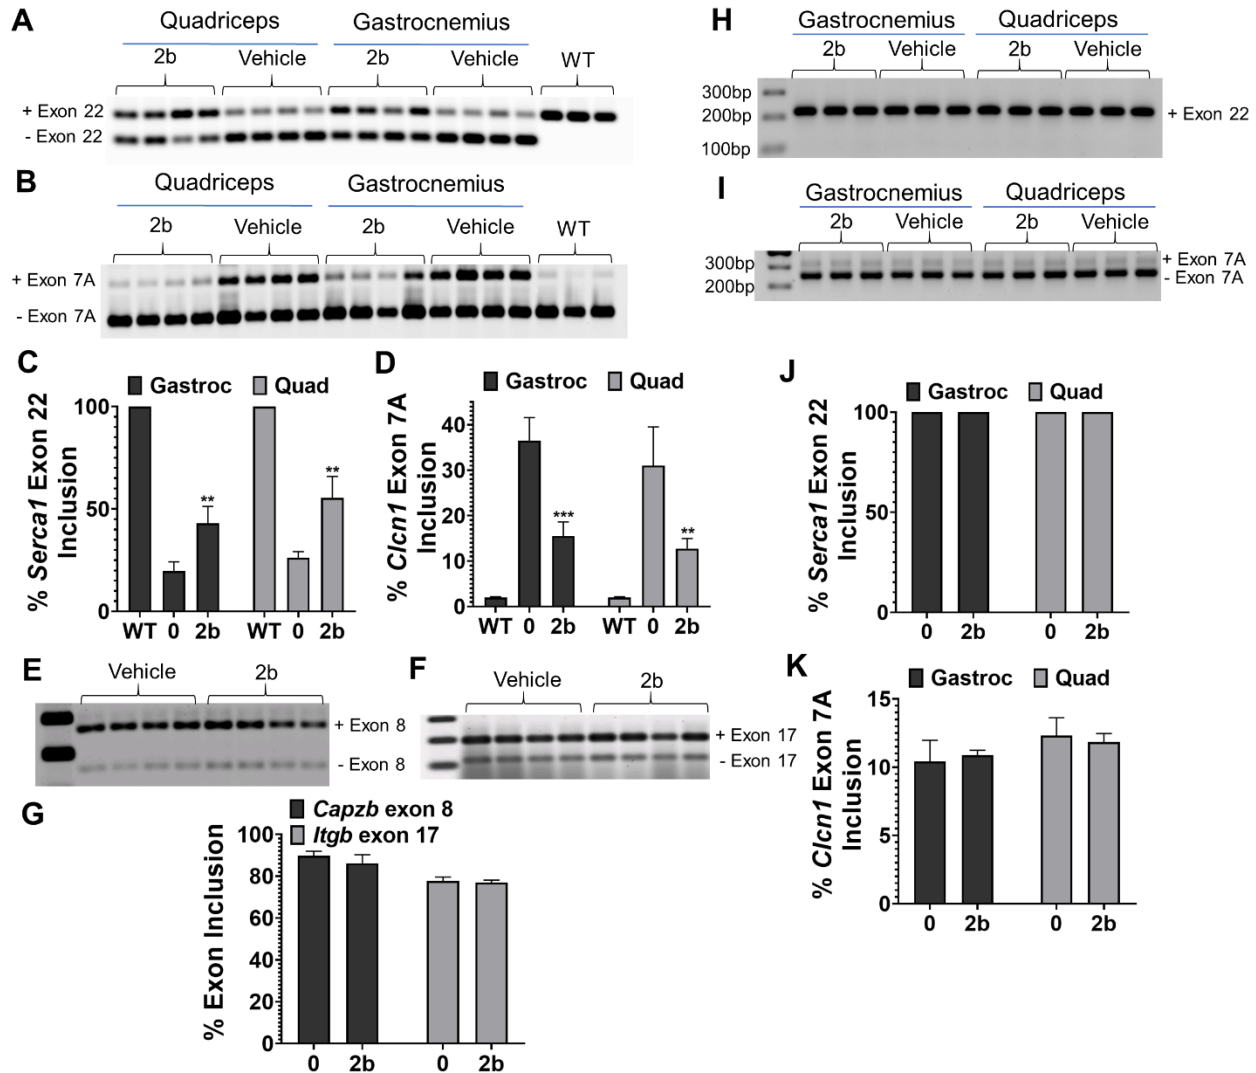

**Figure S4.** Activity of **2b** in *HSA<sup>LR</sup>* mice (related to Figure 3). (A) Representative gel image of *Serca1* exon 22 splicing in the quadriceps and gastrocnemius muscles of *HSA<sup>LR</sup>* mice treated with **2b** (40 mg/kg). (B) Representative gel image of *Clcn1* exon 7A splicing in the quadriceps and gastrocnemius muscles of *HSA<sup>LR</sup>* mice treated with **2b**. (C) Quantification of *Serca1* exon 22 inclusion. (D) Quantification of *Clcn1* exon 7A inclusion. (E) Representative gel image of *Capzb* exon 8 splicing (non-MBNL1 regulated (Lin et al., 2006)) in the quadriceps muscle of *HSA<sup>LR</sup>* mice treated with **2b** (40 mg/kg). (F) Representative gel image of *Itgb* exon 17 splicing [non-MBNL1 regulated (Lin et al., 2006)] in the quadriceps muscle of *HSA<sup>LR</sup>* mice treated with **2b**. (G) Quantification of *Capzb* and *Itgb* exon inclusion. (H) Representative gel image of *Serca1* exon 22 splicing in the quadriceps and gastrocnemius muscles of wild-type (FVB) mice treated with **2b**.

(I) Representative gel image of *Clcn1* exon 7A splicing in the quadriceps and gastrocnemius muscles of wild-type (FVB) mice treated with **2b**. (J) Quantification of *Serca1* exon 22 inclusion. (K) Quantification of *Clcn1* exon 7A inclusion. For all panels: error bars represent SD, \*\*,  $P < 0.01$ ; \*\*\*,  $P < 0.001$ ; as determined by a one-way ANOVA relative to vehicle treated (o). For *HSA*<sup>LR</sup> experiments, n = 4 mice/group; for FVB experiments, n = 3 mice/group.



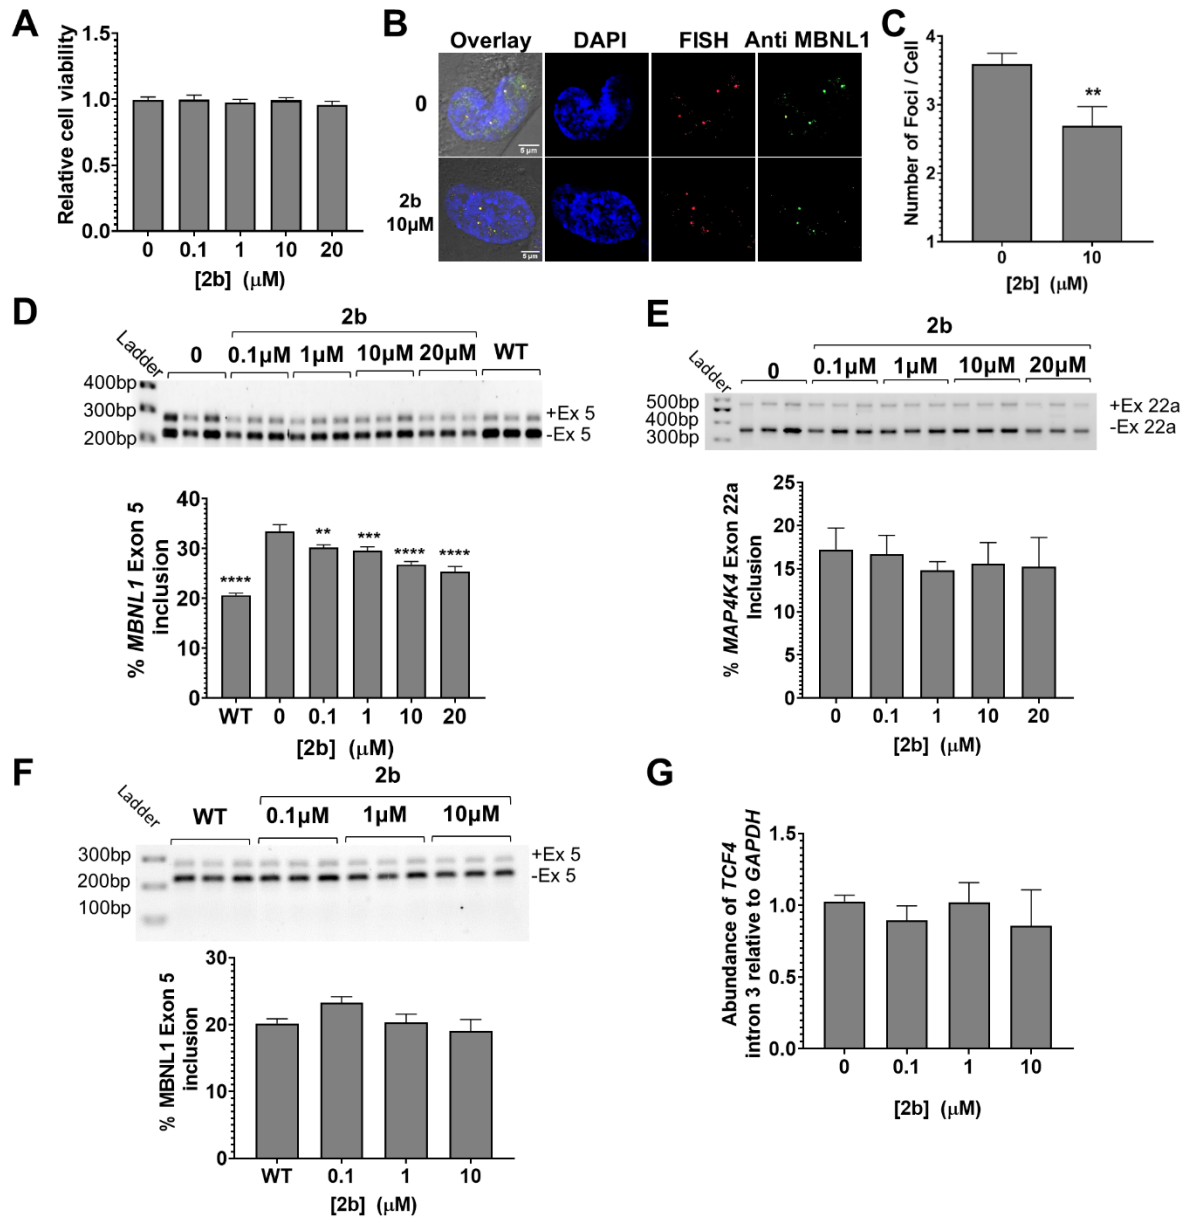

**Figure S5.** Activity of **2b** in FECD and wild-type corneal endothelial cells (related to Figure 5). (A) Toxicity of **2b** in FECD cells (F35T), as determined by CellTiter-Glo (n = 5). (B) Representative images of r(CUG)<sup>exp</sup>-MBNL1 foci as determined by MBNL1 immunostaining and RNA FISH. (C) Quantification of the number of nuclear foci/cell (n = 3, 40 nuclei counted/replicate); \*\*,  $P < 0.01$ , as determined by a two-tailed Student  $t$ -test. (D) Representative gel image of *MBNL1* exon 5 splicing in FECD cells treated with **2b** (top) and quantification of *MBNL1* exon 5 splicing (bottom) (n = 3); \*,  $P < 0.05$ ; \*\*,  $P < 0.01$ ; \*\*\*\*,  $P < 0.0001$ , as determined by a one-way ANOVA. (E) Representative gel

image of *MAP4K4* exon 22a (non-MBNL1 regulated) splicing in FECD cells treated with **2b** (top) and quantification of *MAP4K4* exon 22a splicing (bottom) (n = 3). (F) Representative gel image of *MBNL1* exon 5 splicing in wild-type (F20T) cells treated with **2b** (top) and quantification of *MBNL1* exon 5 splicing (n = 3). (G) Abundance of *TCF4* intron 3 levels in F20T cells treated with **2b** assessed by RT-qPCR (n = 3). For all panels error bars represent SD.

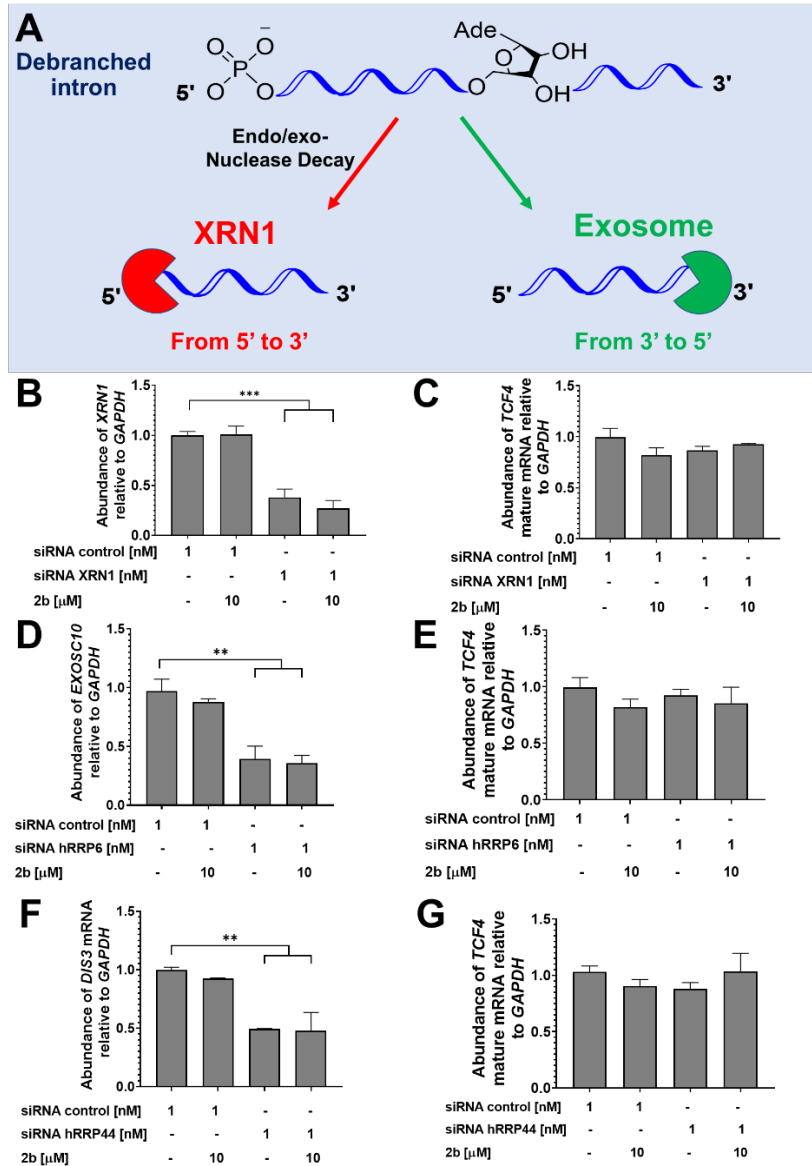

**Figure S6.** Studying the RNA quality control pathways responsible for intron degradation upon **2b** treatment in FECD cells (related to Figure 6). (A) Decay mechanisms for the exosome complex and XRN1. (B, C) Impact of the siRNA knock down of *XRN1* on **2b**'s ability to reduce *TCF4* intron 3 levels in FECD cells. (B) *XRN1* mRNA levels, as determined by RT-qPCR. (C) *TCF4* mature mRNA levels, as determined by RT-qPCR. (D, E) Impact of the siRNA knock down of *hRRP6* on **2b**'s ability to reduce *TCF4* intron 3 levels in FECD cells. (D) *EXOSC10* (*hRRP6*) mRNA levels, as determined by RT-qPCR. (E) *TCF4* mature mRNA levels, as determined by RT-qPCR. (F, G) Effect of knock-down of *hRRP44* via an siRNA on **2b**'s ability to reduce *TCF4* intron 3 levels in FECD

cells. (F) *DIS3* (hRRP44) mRNA levels, as determined by RT-qPCR. (G) *TCF4* mature mRNA levels, as determined by RT-qPCR. For all panels,  $n = 3$ , and error bars represent SD. \*\*,  $P < 0.01$ ; \*\*\*,  $P < 0.001$ , as determined by one-way ANOVA compared to untreated cells (“o”).

**Data S1.** Compound characterization (NMR and HRMS spectra and analytical HPLC traces) (related to STAR Methods).

**1a:**

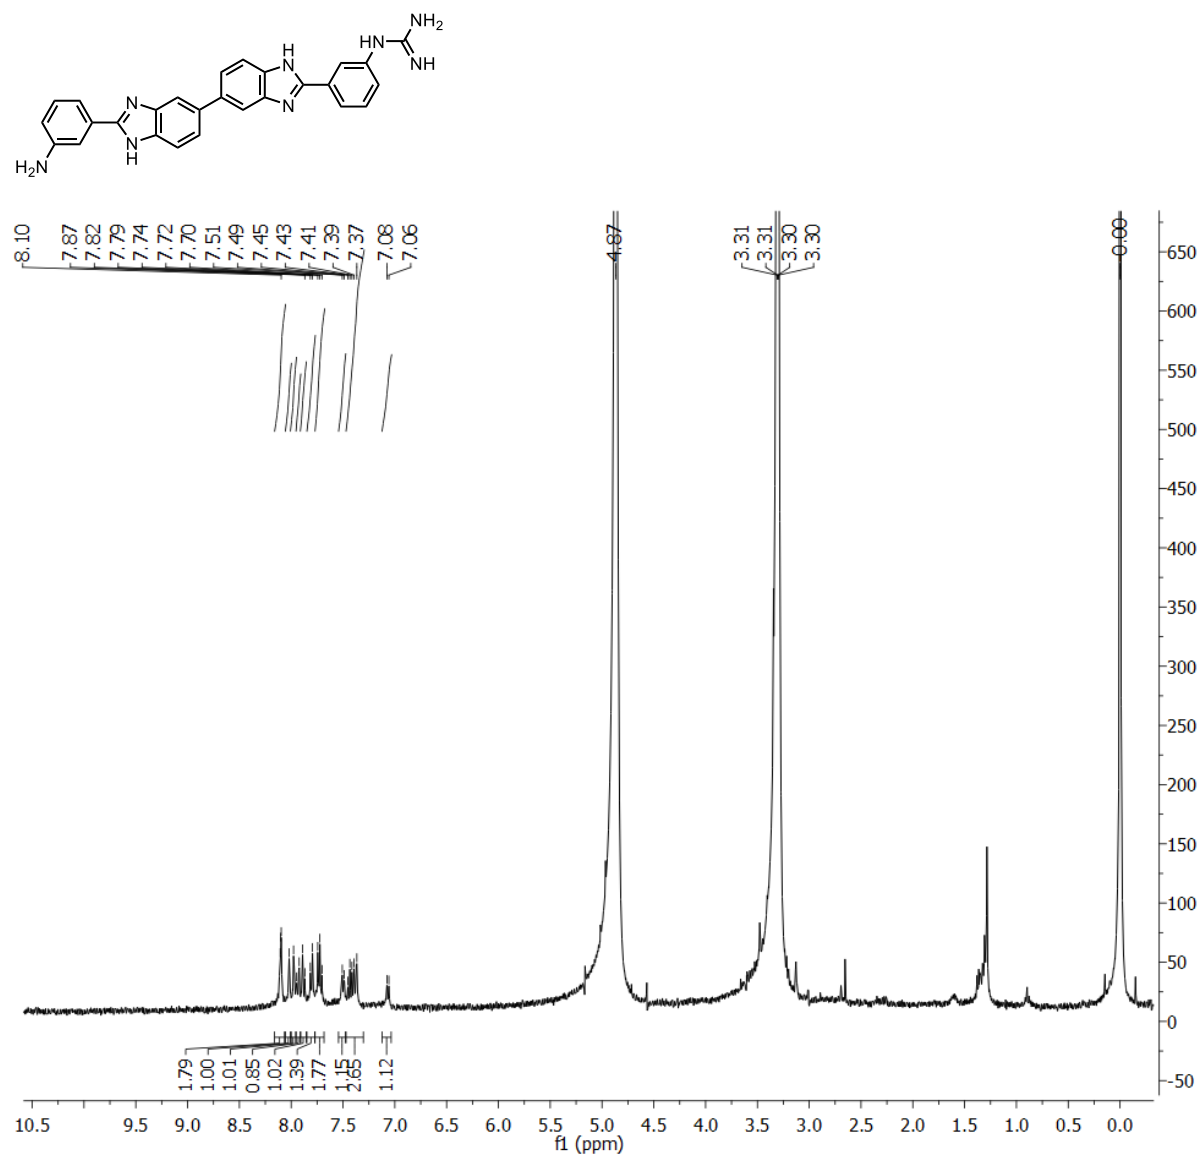

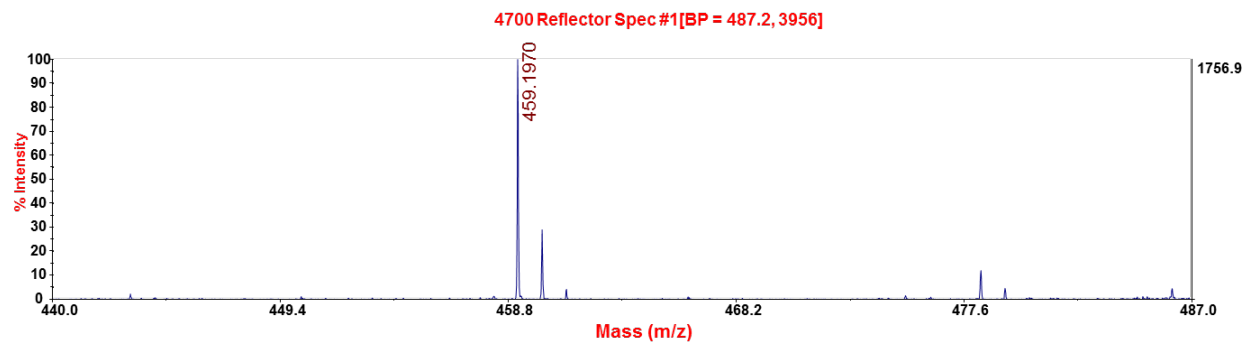

1b:

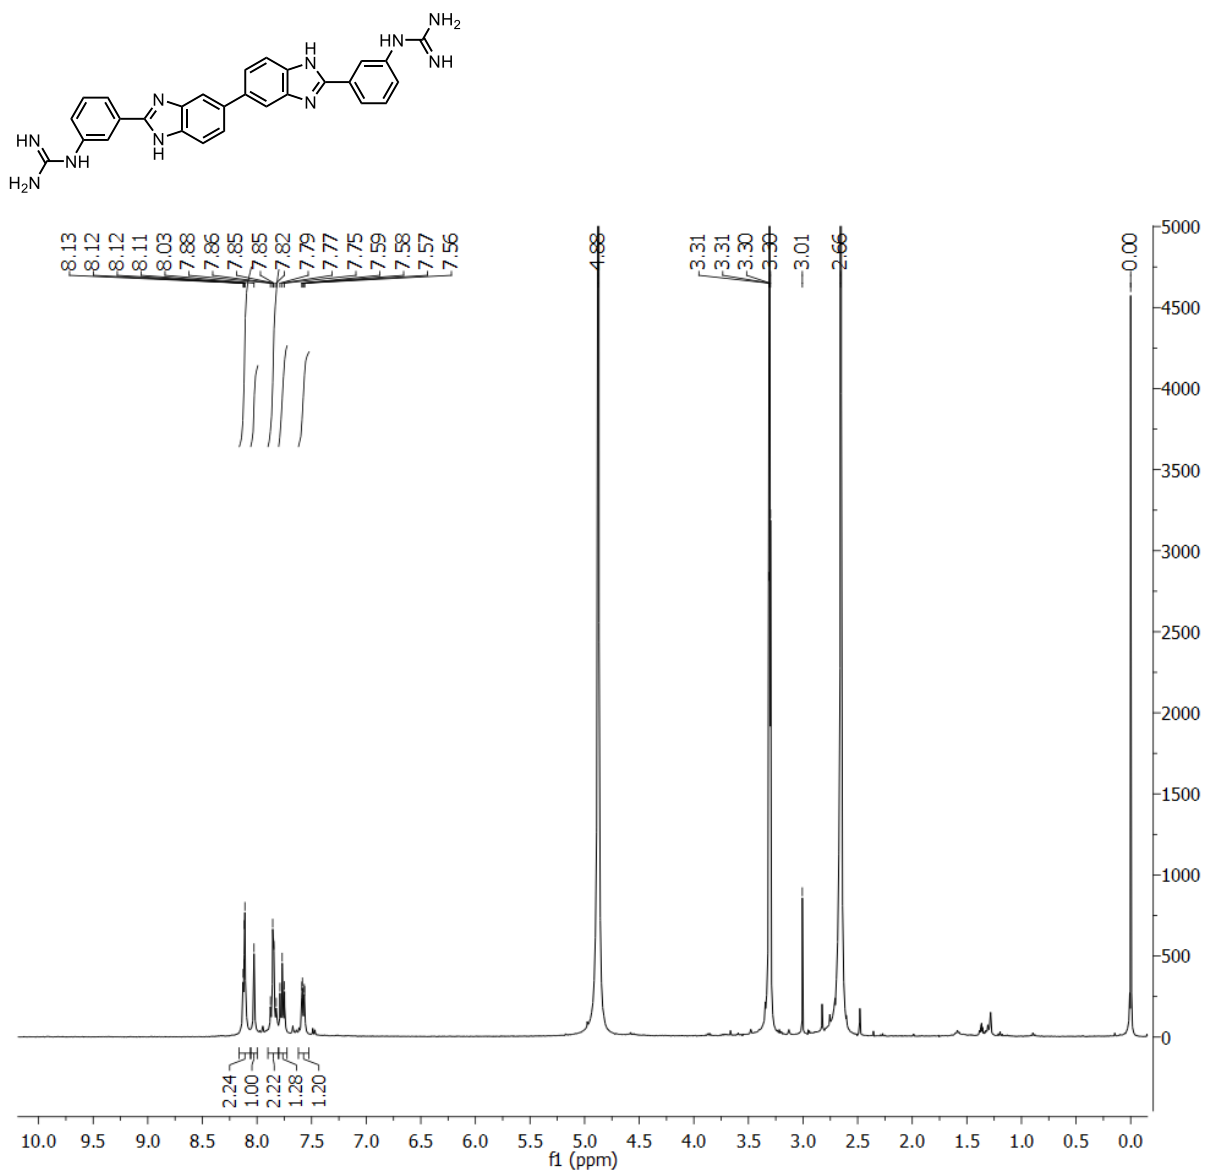

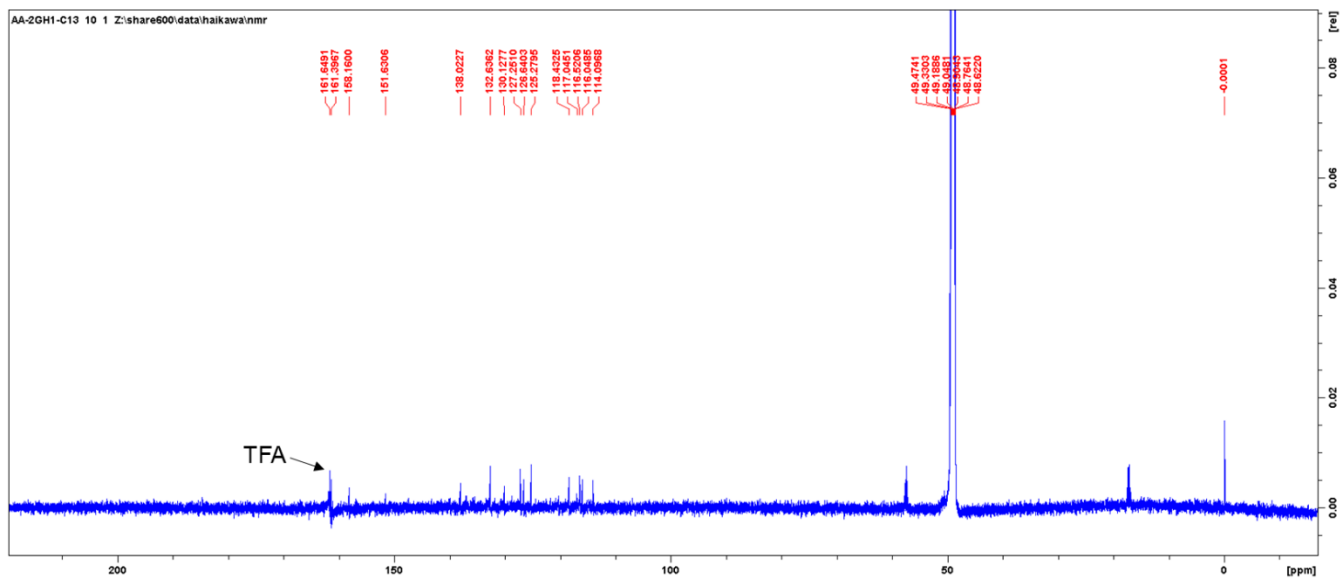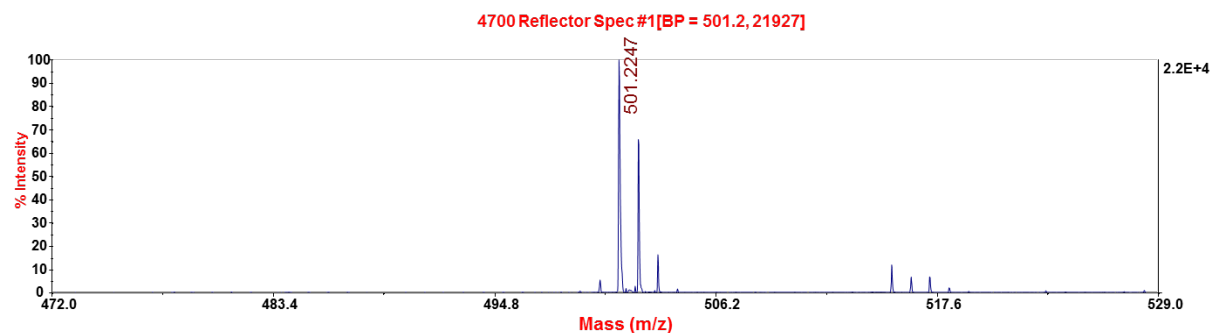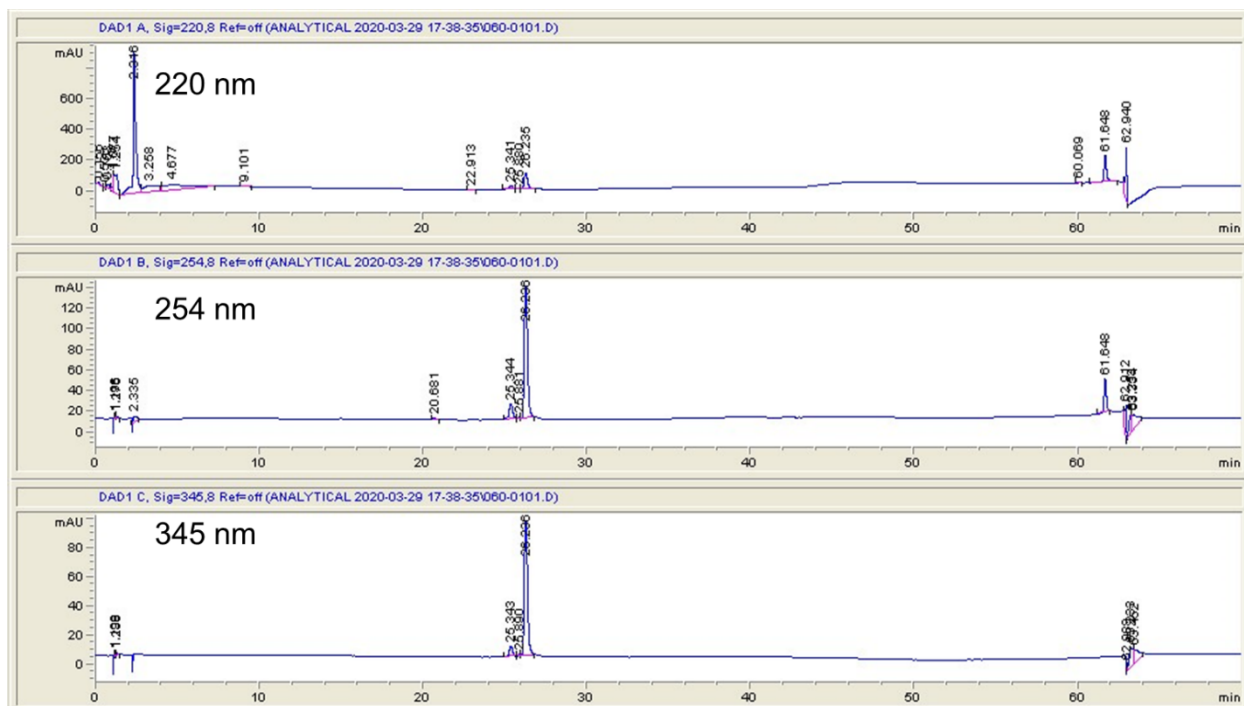

**2a:**

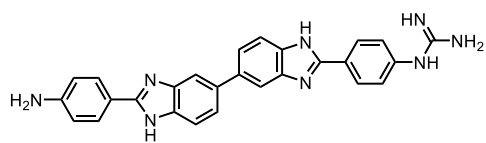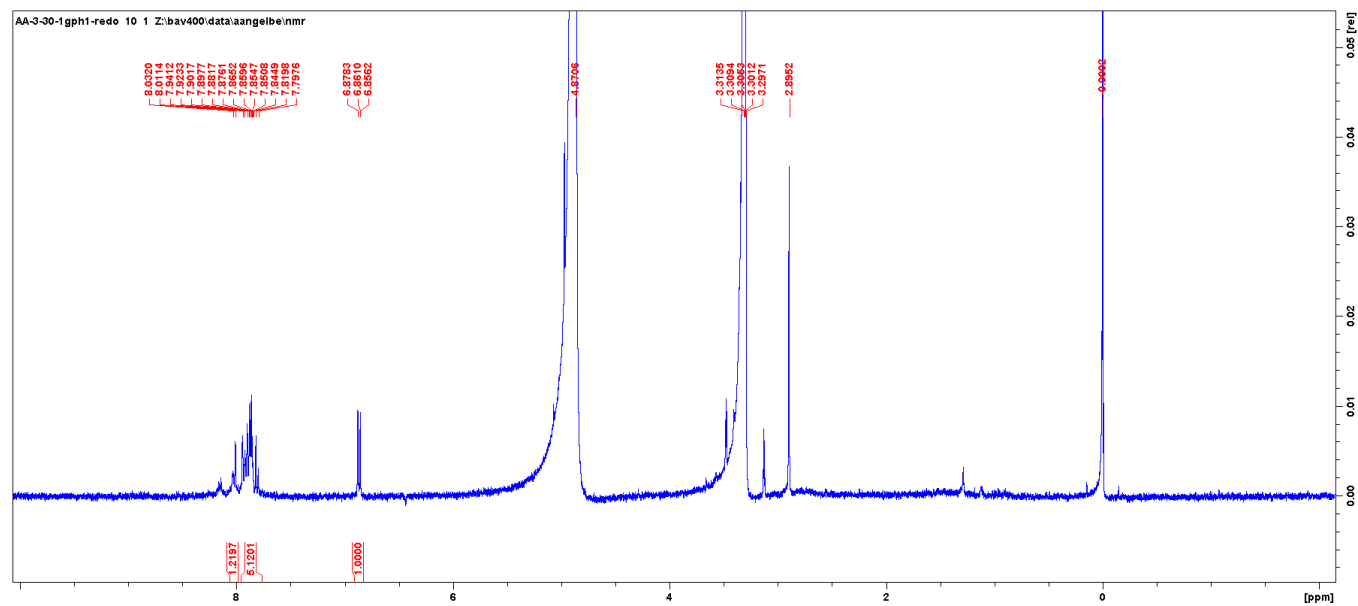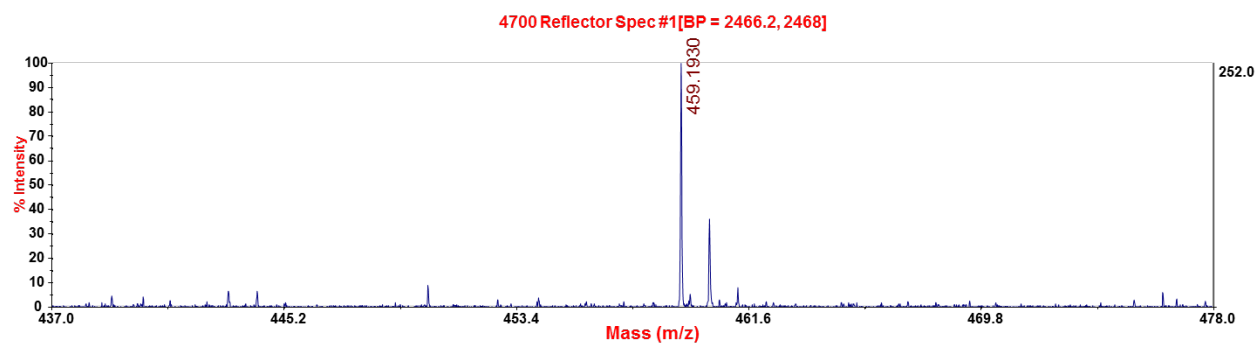





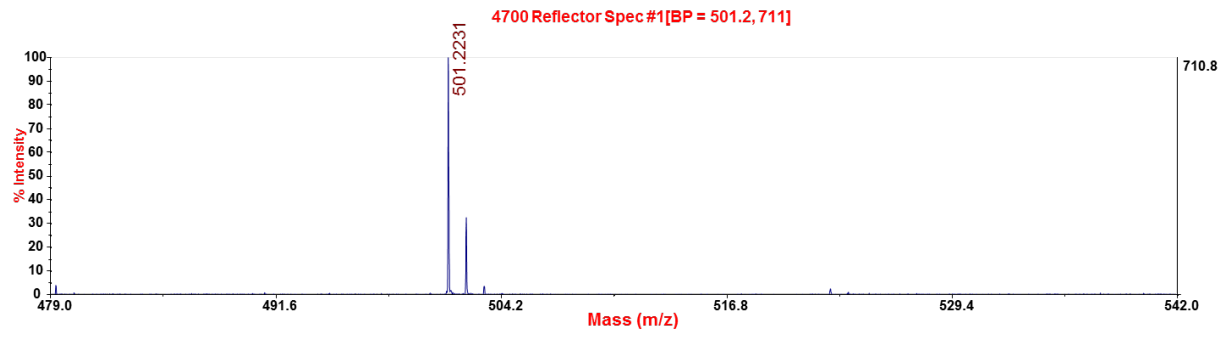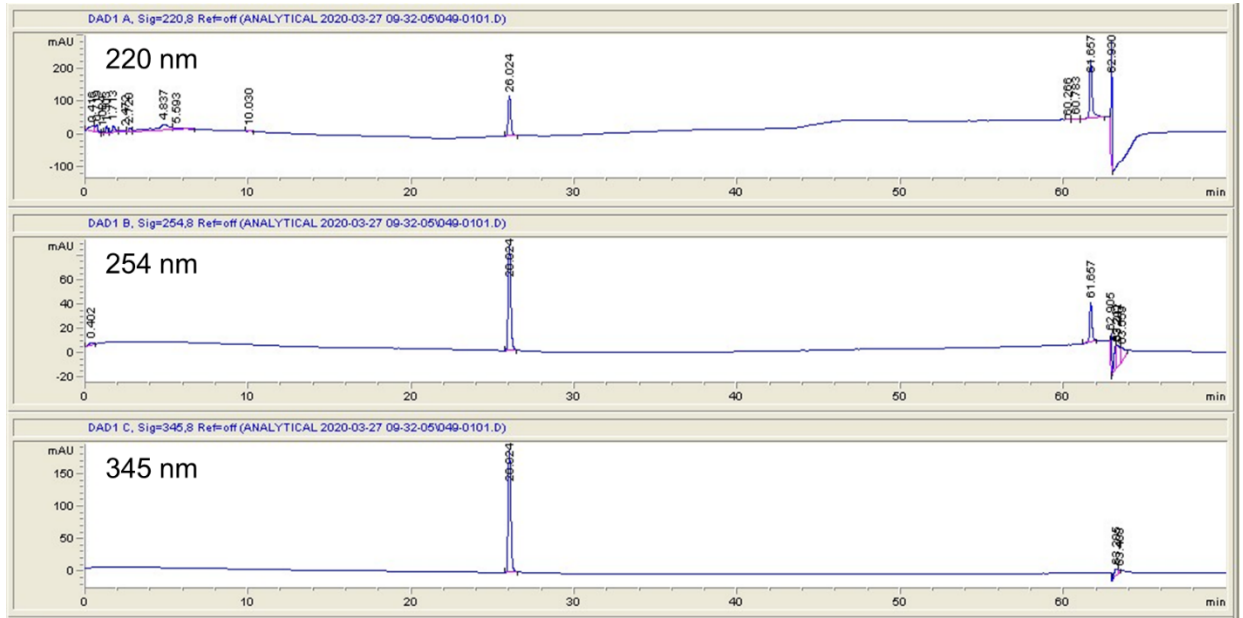

3b.

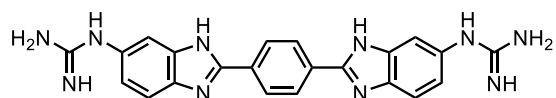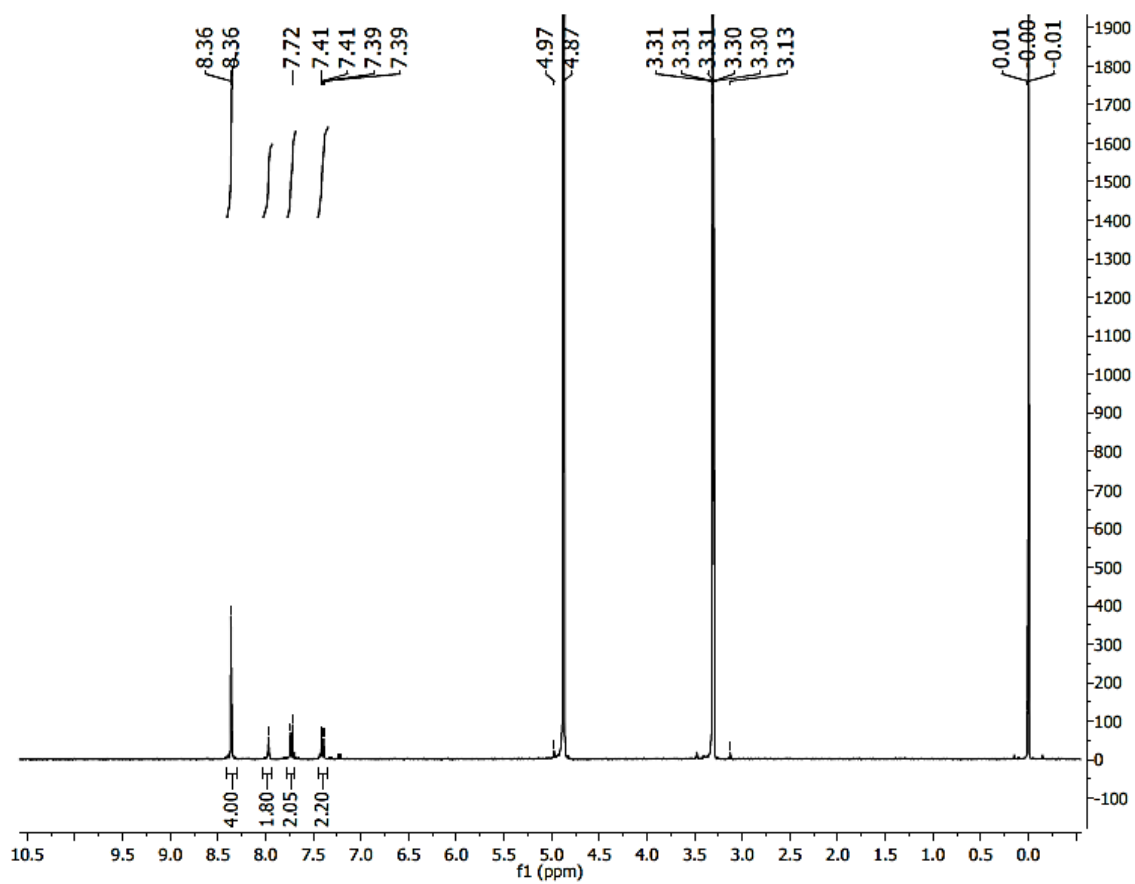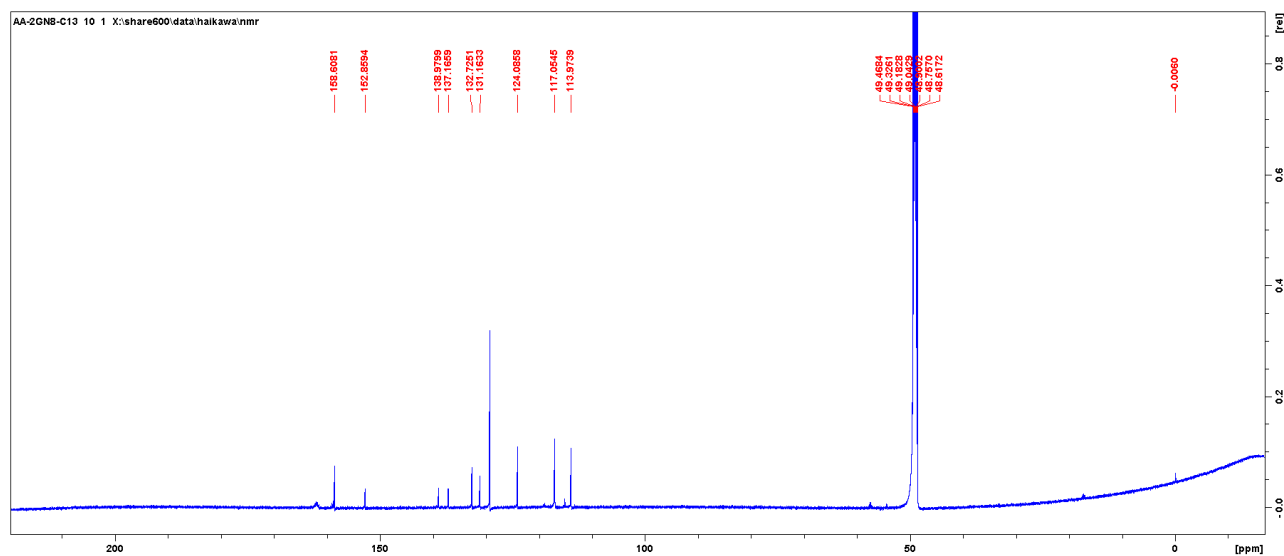

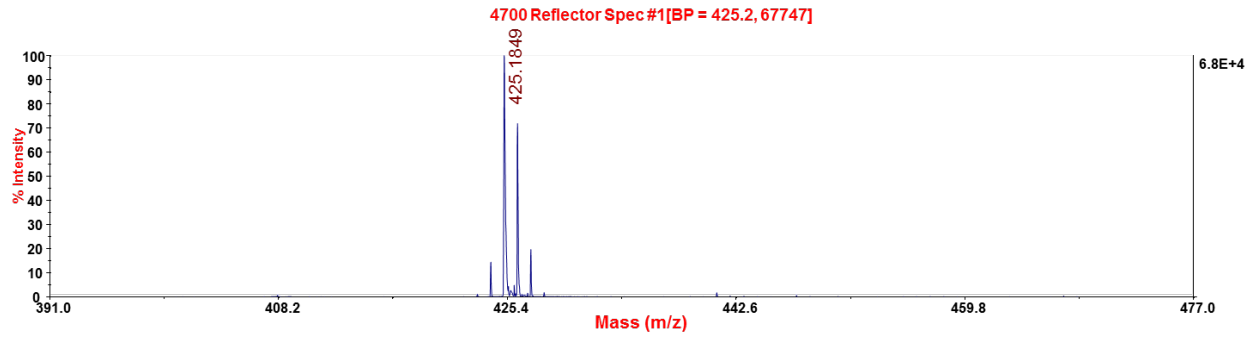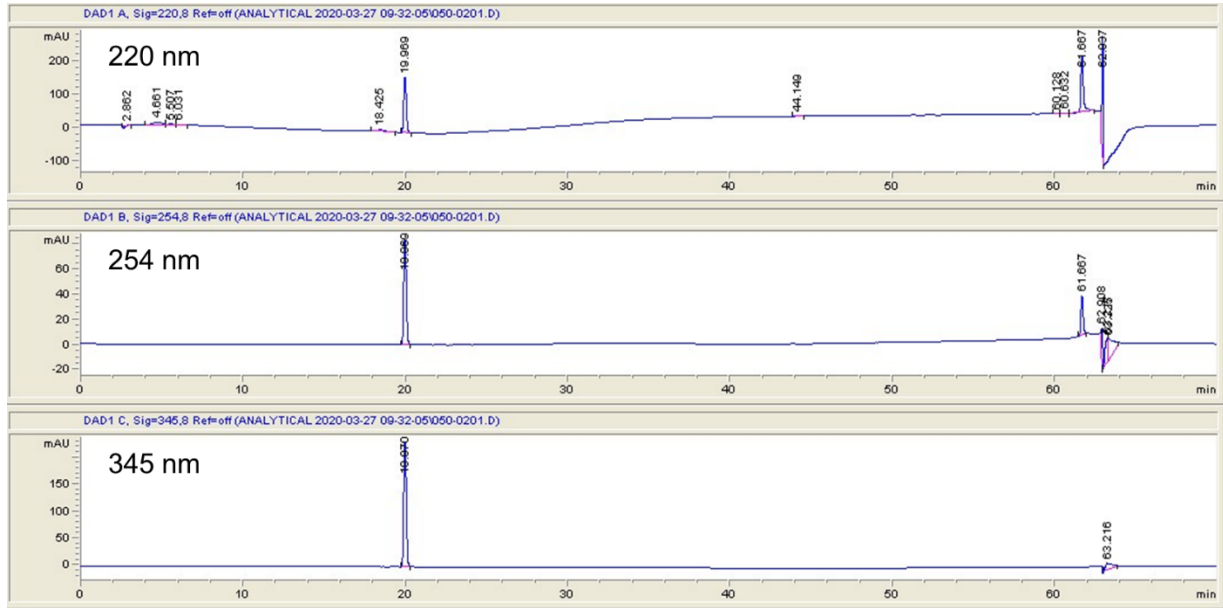

Supplement: NIHMS1646111-supplement-1.pdf [file NIHMS1646111-supplement-1.pdf]
